# Supplementary material for: A ROMP-derived, polymer-supported chiral Schrock catalyst for enantioselective ring-closing olefin metathesis
Source: Royal Society of Chemistry journal article supplement (doi:10.1039/b306427a), 2003-01-01
Supplement: b306427a.doc [file b306427a.doc]

# Supporting Information

**to**

A ROMP-derived, polymer-supported heterogeneous chiral catalyst for enantioselective ring-closing olefin metathesis

by

Roswitha M. Kröll, Norbert Schuler, Said Lubbad and Michael R. Buchmeiser*

#### Experimental

NMR data were obtained at 300.13 MHz for proton and at 75.74 MHz for carbon in the indicated solvent at 25°C on a Bruker Spectrospin 300 and are listed in parts per million downfield from tetramethylsilane for proton and carbon. IR spectra were recorded on a Bruker Vector 22 using ATR technology (Golden Gate). Mass spectra were recorded on a Finnigan MAT 95S. For the determination of the enantiomeric excess (*ee*), a Shimadzu GCMS-QP 5050 equipped with a Supelco Beta DexTM 120 fused silica capillary column (30 m x 0.25 mm x 0.25µm film thickness) and a chiral HPLC system equipped with a Cyclobond I 2000 (150 mm x 2.0 mm), respectively, were used. For the determination of the actual molybdenum content, the supported catalyst was decomposed in *aqua regia* using a MLS 1200 mega high performance microwave digestion unit. Molybdenum was quantified by inductively coupled plasma optical emission spectrometry (ICP-OES) using a Jobin Yvon ICP-OES.

All manipulations involving air- and moisture-sensitive compounds were carried out under dry nitrogen in a MBraun glove box. Purchased starting materials were used without any further purification. Diethyl ether, pentane, dimethoxy ethane, and tetrahydrofurane (THF) were distilled from sodium benzophenone ketyl under nitrogen. Methylene chloride was distilled from calcium hydride. Mo(N-2,6-*i*-Pr2C6H3)(CHCMe2Ph)(OSO2CF3)2DME (DME = dimethoxy ethane)1, Ru(CH-o-*i*-Pr-O-C6H4)(OOCCF3)2(IMesH2) (IMesH2 = 1,3-bis(2,4,6-trimethylphenyl)-4,5-dihydroimidazol-2-ylidene)2, (R)-5,5´-bis(bromomethyl)-3,3´-di-*t*-butyl-6,6´-dimethylbiphen-2,2´-diol (1)3, allyldimethyl-[3-methyl-1-(2-methyl-allyl)-but-3-enyloxy]silane4, (1-allyloxy)-2-methylallylbenzene,5 allyl-(3-methyl-1-phenyl-but-3-enyl)-phenylamine6, and (2-methylallyl)-phenyl-(1-phenyl-but-3-enyl)-amine6 were synthesised according to the literature.

*Synthesis of 5,5´-bis(norborn-5-ene-2-ylmethylenoxymethyl)-3,3´-di-t-butyl-6,6´-dimethyl-biphen-2,2´-diol**(****2****):* 5-Norbornene-2-methanol (*exo/endo* mixture, 1.728 g, 13.92 mmol) was dissolved in 50 mL of THF and cooled to -38°C. Sodium hydride (0.367 g, 15.3 mmol) was added and the solution was stirred at room temperature for 16 h. Excess of sodium hydride was filtered off. The alcoholate was added drop wise to a cooled (-38°C) solution of **1** (1.42 g, 2.77 mmol) in THF (50 mL). The reaction mixture was stirred at room temperature for 14 h. Then, all solvent was evaporated and the crude product was extracted from n-pentane/water. The product was purified by column chromatography (silica 60, 30 x 2 cm, *n*-pentane:diethyl ether = 30:1), yielding 1.23 g (2.05 mmol, 74 %) of **2**. 1H NMR (CDCl3):  = 7.3 (2 H, s, H-Ar), 6.1 – 5.9 (4 H, m, CH, NBE), 4.9 (2 H, s, OH), 4.5 – 4.3 (4 H, m, CH2O), 3.6 – 3.1 (4 H, m, CH2O), 2.9, 2.8 (4 H, s, CH, NBE), 2.4 (2 H, m, CH, NBE), 1.9 (6 H, s, CH3), 1.4 (18 H, s, CH3). 13C NMR (CDCl3):  = 152.4 (CAr-OH), 137.4, 136.8, 135.7, 133.6, 132.6, 129.4, 121.2 (CAr, CH = CH), 74.5, 72.4 (CH2), 49.6 (CH2, NBE), 44.2, 42.4 (CH, NBE), 39.0 (CHMe3), 34.8 (CH, NBE), 30.0 (CH3), 29.7 (CH2, NBE), 15.4 (CH3). IR (ATR): 3 500, 2 950, 1 274, 1 174, 1 086, 712. MS (70 *eV*) : *m/z* = 598 (M+), 475 (M+ - NBE-CH2O), 352 (M+ - 2 NBE-CH2O).

*Synthesis of* **poly-2**: **2** (0.206 g, 0.344 mmol) was dissolved in 100 mL of methylene chloride. Ru(CH-o-*i*-Pr-O-C6H4)(OOCCF3)2(IMesH2) (9.0 mg, 0.012 mmol) was added and the mixture was stirred for 18 h at 43°C. Then, ethyl vinyl ether (10 µL, 0.104 mmol) was added and the mixture was stirred for another 30 min. Finally, pentane was added and the polymer was filtered off, washed thoroughly with pentane and dried *in* *vacuo*, yielding 0.166 g of an off-white solid. FT-IR (ATR, cm-1): 3509 (OHst), 2944 (C-Hst), 1177 (C-Ost), 1082 (C-O-Cst as).

*Synthesis of* (**R)-3**: Poly-**2** (0.160 g) was suspended in 70 mL of methylene chloride and cooled to –38°C. Potassium hydride (0.021 g, 0.53 mmol) was added and the reaction mixture was stirred overnight. Mo(N-2,6-*i*-Pr2C6H3)(CHCMe2Ph)(OSO2CF3)2DME (0.140 g, 0.177 mmol), dissolved in 10 mL of methylene chloride, was added to the solution. The reaction mixture was stirred for 6 h at room temperature. During this time the supported catalyst precipitated as a brownish solid. The solid was filtered off, washed with pentane and diethyl ether until the washings run through colorless and dried *in* *vacuo*. Yield: 0.161 g of a brown polymer. Molybdenum content: 0.47 mmol/g.

*(1-Isopropenyl-2-methyl-allyloxy)dimethylvinylsilane.* Vinyldimethylchlorosilane (1.97 mL, 14.28 mmol) and triethylamine (3.98 mL, 28.55 mmol) were dissolved in methylene chloride and cooled to 0°C. 2,4-Dimethyl-1,4-pentadiene-3-ol (1.068 g, 9.52 mmol) was added drop wise and the solution was stirred at room temperature overnight. Then, the solvent was evaporated and the crude product was extracted with water/diethyl ether. The organic layer was dried over Na2SO4. The pure product was obtained by distillation (65-67°C/14 Torr), yielding 1.30 g (6.64 mmol, 70 %) of a colorless liquid. 1H NMR (CDCl3):  6.2 – 5.6 (3 H, m, CH=CH2), 5.0 (2 H, s, =CH2), 4.9 (2 H, s, =CH2), 4.4 (1 H, s, CHO), 1.6 (6 H, s, CH3), 0.2 (6 H, s, SiCH3). 13C NMR (CDCl3)  145.5 (MeC), 139.7 (CH), 132.9 (=CH2), 111.7 (=CH2), 80.2 (CHO), 17.9 (CH3), -1.5 (SiCH3). IR (ATR): 2 958, 1 254, 1 086, 895, 837, 786.

### *Representative procedure for RCM experiments*: Allyldimethyl-(3-methyl-1-(2-methylallyl)-but-3-enyloxy)silane (11.0 mg, 0.0461 mmol) was dissolved in 2 mL of benzene. (R)-3 (3.4 mg, 3.4 mol-%) was added and the reaction mixture was stirred for 30 min at room temperature and for another 2 h at 45°C. The supported catalyst was filtered off and washed twice with 2 mL of benzene. Product yields and *ee*’s were determined by chiral GC-MS (68 % yield, 66 % *ee*) using ethylbenzene as internal standard.

### *Representative procedure for recycling of the supported catalyst:* Allyldimethyl(3-methyl-1-(2-methylallyl)-but-3-enyloxy)silane (12.0 mg, 0.050 mmol) was dissolved in 2 mL of pentane. (R)-3 (5.0 mg, 5.5 mol-%) was added in one portion. The reaction mixture was stirred at 20°C for 35 min. The catalyst was filtered off and transferred to a freshly prepared solution of the monomer (12.0 mg, 0.0503 mmol) dissolved in 2 mL of pentane. This cycle was repeated twice. All reaction mixtures were analysed by GC-MS for *ee* and yield. In a last step, the catalyst was dried *in vacuo*, digested in *aqua regia* and analysed for Mo by ICP-OES. After three cycles of RCM, the Mo-loss was < 5%.

*Leaching of the Support:* *Aqua regia* (3.0 mL) was added to the polymer-bound catalyst (30 mg). The mixture was placed inside high-pressure Teflon tubes and leaching was carried out under Microwave conditions (50, 600, and 450 *W* pulses, respectively, *t* = 32 minutes). After cooling to room temperature, the mixture was filtered and water was added up to a volume of 10.00 mL.

*ICP-OES Measurements:* Mo was measured by ICP-OES ( = 202.030 nm, ion line). The background was measured at  = 202.043 and 202.016 nm, respectively. Standardisation was carried out with Mo standards containing 0, 5 and 10 ppm of Mo.

1 J. H. Oskam, H. H. Fox, K. B. Yap, D. H. McConville, R. O'Dell, B. J. Lichtenstein and R. R. Schrock, *J. Organomet. Chem.*,1993, **459**, 185.

2 J. O. Krause, K. Wurst, O. Nuyken and M. R. Buchmeiser, *Chem. Eur. J.*,2003, **submitted**.

3 J. B. Alexander, R. R. Schrock, W. M. Davies, K. C. Hultzsch, A. H. Hoveyda and J. H. Houser, *Organometallics*,2000, **19**, 3700.

4 A. F. Kiely, J. A. Jernelius, R. R. Schrock and A. H. Hoveyda, *J. Am. Chem. Soc.*,2002, **124**, 2868.

5 D. S. La, J. B. Alexander, D. R. Cefalo, D. D. Graf, A. H. Hoveyda and R. R. Schrock, *J. Am. Chem. Soc.*,1998, **120**, 9720.

6 S. J. Dolman, E. S. Sattely, A. H. Hoveyda and R. R. Schrock, *J. Am. Chem. Soc.*,2002, **124**, 6991.
